# Supplementary material for: FAPbBr3perovskite nanocrystals decorated on a graphitic carbon nitride (g-C3N4) sheet for interfacial hole transfer
Source: Royal Society of Chemistry journal article supplement (doi:10.1039/d2nj04494c), 2022-12-10
Supplement: d2nj04494c1.pdf [file d2nj04494c1.pdf]

## Supporting Information

### **FAPbBr<sub>3</sub> Perovskite Nanocrystals Decorated on Graphitic Carbon Nitride (g-C<sub>3</sub>N<sub>4</sub>) Sheet for Interfacial Hole Transfer**

Sumit Kumar<sup>a</sup>, Abha Jha<sup>a</sup> and Prasenjit Kar<sup>a\*</sup>

Department of Chemistry

Indian Institute of Technology Roorkee, Uttarakhand, India

Corresponding Email address: [kar.prasen@gmail.com](mailto:kar.prasen@gmail.com), [prasenjit.kar@cy.iitr.ac.in](mailto:prasenjit.kar@cy.iitr.ac.in)

## **Content**

**Fig. S1** PL spectra of FAPbBr<sub>3</sub> perovskite nanocrystals with solvent (0 μL to 620 μL).

**Fig. S2** FT-IR spectra of PNC@g-C<sub>3</sub>N<sub>4</sub> nanocomposites, PNC and g-C<sub>3</sub>N<sub>4</sub>.

**Fig. S3** XPS analysis of PNC.

**Fig. S4** XPS analysis of PNC@g-C<sub>3</sub>N<sub>4</sub>.

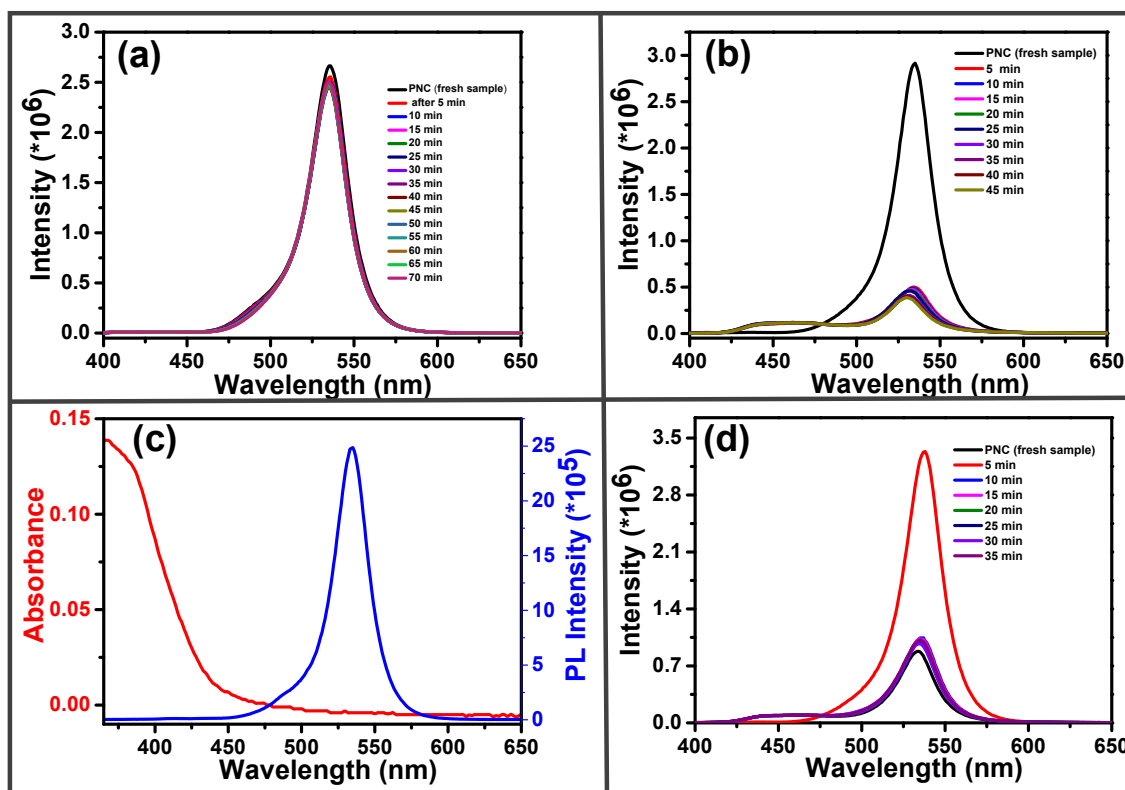

**Fig. S1.** (a) PL spectra of FAPbBr<sub>3</sub> perovskite nanocrystals with solvent (0 μL to 620 μL) show that no significant changes were observed. This represents that g-C<sub>3</sub>N<sub>4</sub> is responsible for quenching the fluorescence of perovskite nanoparticle, (b & d) Fluorescence quenching of PNC in presence of (b) 620 μL of the g-C<sub>3</sub>N<sub>4</sub> solution, (d) with 300 μL of a g-C<sub>3</sub>N<sub>4</sub> solution, (c) No possibility of FRET.

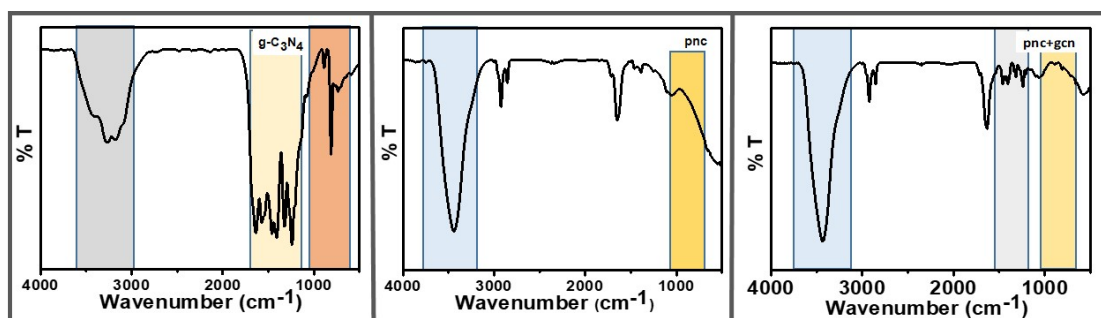

| FREQUENCY RANGE (CM <sup>-1</sup> ) | FUNCTIONAL GROUP               |
|-------------------------------------|--------------------------------|
| 810-812                             | CN heterocycle (triazine)      |
| 1234-1470                           | C-N stretching                 |
| 3170-3190                           | NH, NH <sub>2</sub> stretching |
| 3400-3480                           | -COOH stretching               |

**Fig. S2.** FT-IR spectra of PNC@g-C<sub>3</sub>N<sub>4</sub> nanocomposites, PNC and g-C<sub>3</sub>N<sub>4</sub>.

The FTIR spectra of FAPbBr<sub>3</sub>@g-C<sub>3</sub>N<sub>4</sub> and FAPbBr<sub>3</sub> show a negligible shift in stretching vibrational frequency. However, an additional peak present at 1313.27 cm<sup>-1</sup> indicates the g-C<sub>3</sub>N<sub>4</sub> environment present around the FAPbBr<sub>3</sub> perovskite nanoparticle.

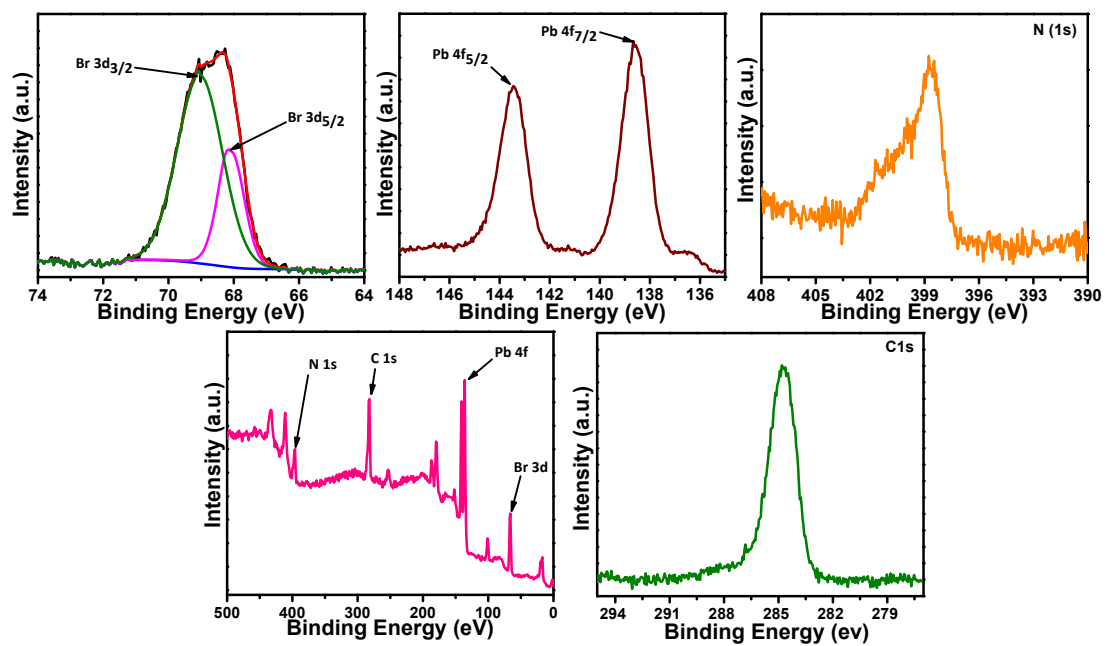

Fig. S3 XPS analysis of PNC.

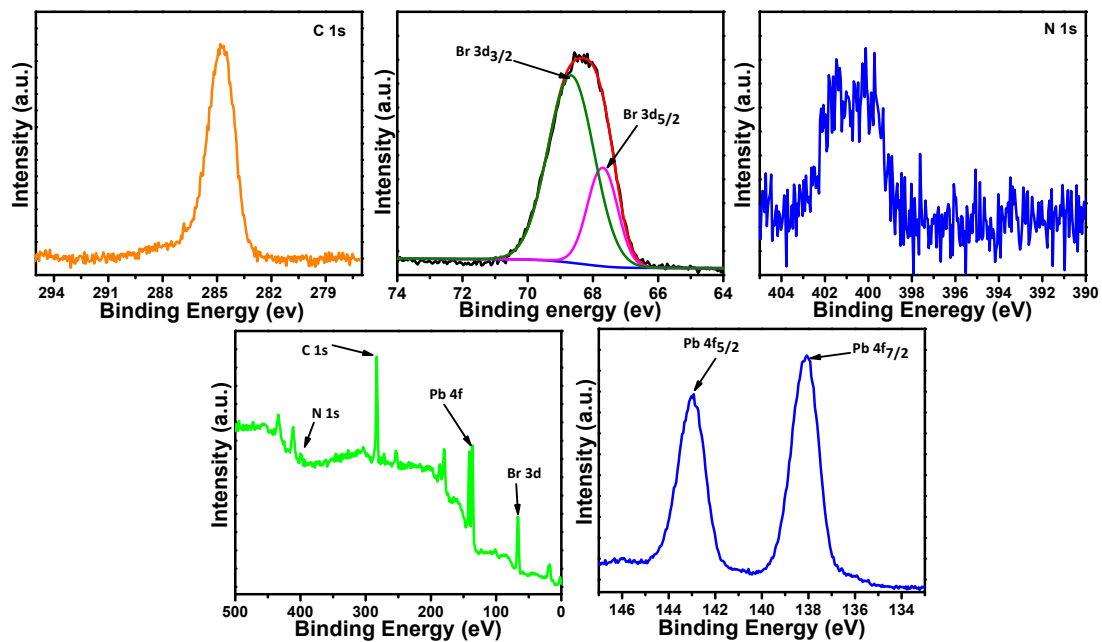

Fig. S4 XPS analysis PNC@g-C<sub>3</sub>N<sub>4</sub>.
